# Supplementary material
Source: MDPI journal article supplement (https://www.mdpi.com/2073-4344/8/3/118)
Supplement: s1 [file s1]

Supplementary Materials

# Photocatalytic Performance and Degradation Mechanism of Aspirin by $\text{TiO}_2$ through Response Surface Methodology

Lezhuo Li<sup>1</sup>, Qiuling Ma<sup>3</sup>, Sanfan Wang<sup>1</sup>, Sanxiang Song<sup>1</sup>, Bo Li<sup>3,4</sup>, Ruonan Guo<sup>3</sup>, Xiuwen Cheng<sup>3,4,\*</sup> and Qingfeng Cheng<sup>2</sup>

- <sup>1</sup> Engineering Research Center for Cold and Arid Regions Water Resource Comprehensive Utilization (Ministry of Education), School of Environmental and Municipal Engineering, Lanzhou Jiaotong University, Lanzhou 730070, China; lilezhuo@163.com (L. L.); sfwang1612@163.com (S. W.); ssx156@163.com (S. S)
  - <sup>2</sup> College of Resources and Environment, Chengdu University of Information Technology, Chengdu 610225, China; chqf185@163.com; chqf185@163.com (Q. C)
  - <sup>3</sup> Key Laboratory of Western China's Environmental Systems (Ministry of Education), College of Earth and Environmental Sciences, Lanzhou University, Lanzhou 730000, China; mql2016@lzu.edu.cn (Q. M); lb2017@lzu.edu.cn (B. L); guorn14@lzu.edu.cn (R. G)
  - <sup>4</sup> Key Laboratory of Comprehensive and Highly Efficient Utilization of Salt Lake Resources, Qinghai Institute of Salt Lakes, Chinese Academy of Sciences, Xinning Road 18, Chengxi District, Xining 810008, China
- \* Correspondence: chengxw@lzu.edu.cn, Tel.: +86-931-891-1843.

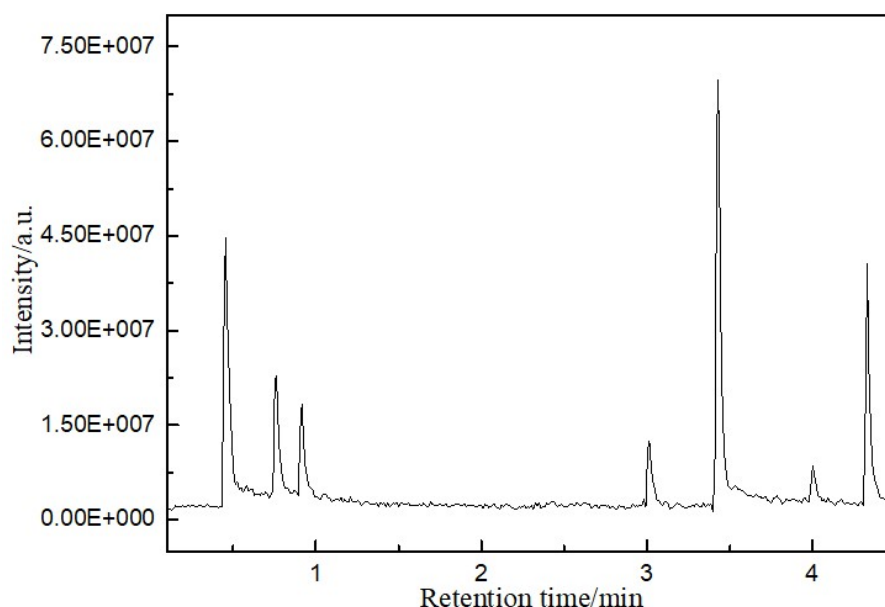

**Figure S1** Typical LC-ESI/MS chromatography of aspirin degraded by P25  $\text{TiO}_2$  nano-catalyst after 60 min Xenon lamp illumination.

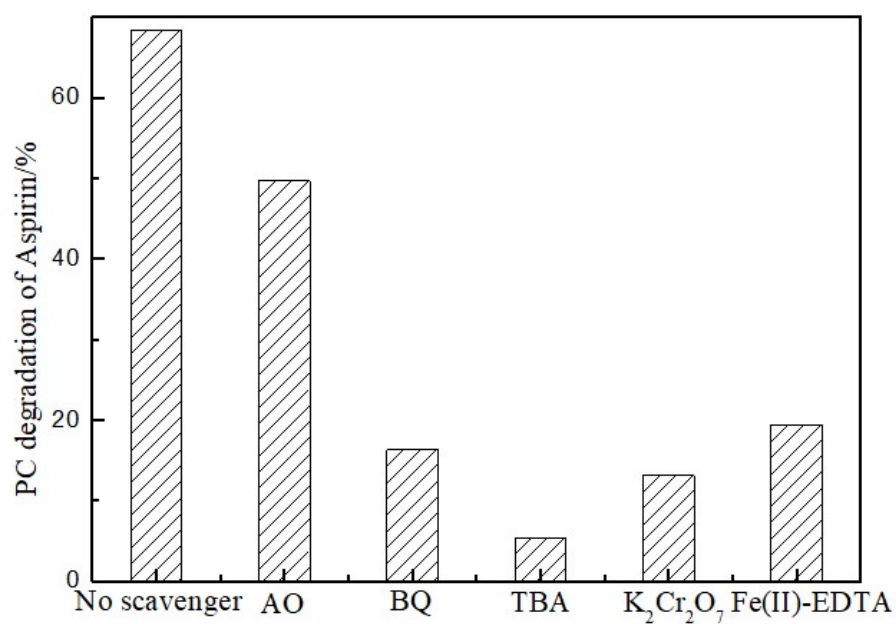

**Figure S2** Effect of each reaction species on PC degradation of aspirin solution by P25.

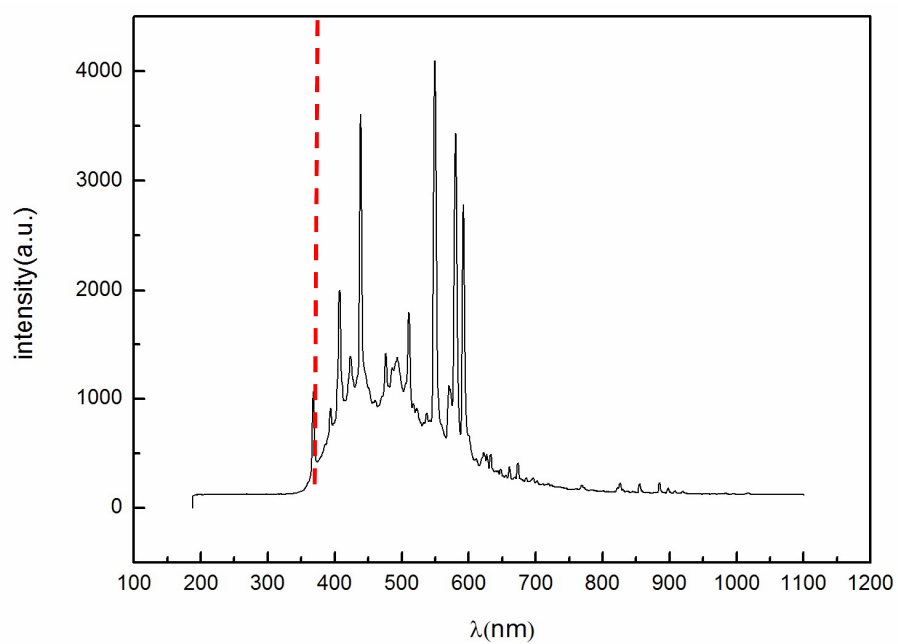

**Figure S3** Emission spectrum of 35 W Xenon lamp.
